# Supplementary material for: Berberrubine Phosphate: A Selective Fluorescent Probe for Quadruplex DNA
Source: MDPI journal article supplement (doi:10.3390/molecules26092566), 2021-04-28
Supplement: s1 [file s1]

# Berberrubine phosphate: A selective Fluorescent Probe for Quadruplex DNA

Peter Jonas Wickhorst and Heiko Ihmels

Department of Chemistry – Biology, University of Siegen, Center of Micro- and Nanochemistry and Engineering (*Cμ*), Adolf-Reichwein-Str. 2, 57068 Siegen, Germany.

## Supporting Information

### Table of Contents

|                                                 |     |
|-------------------------------------------------|-----|
| 1. Absorption and emission spectra              | S2  |
| 2. Determination of fluorescence quantum yields | S3  |
| 4. Photometric and fluorimetric DNA titrations  | S4  |
| 5. Thermal DNA-denaturation experiments         | S7  |
| 6. CD- and LD-spectroscopic analysis            | S8  |
| 7. NMR spectra                                  | S9  |
| 8. References                                   | S10 |

## 1. Absorption and emission spectra

Solutions were prepared for each measurement from stock solutions of the derivative **2** in MeOH ( $c = 1.0$  mM). Aliquots of the stock solution were thoroughly evaporated under a stream of nitrogen, and the residue was redissolved in the respective solvent or solvent mixture.

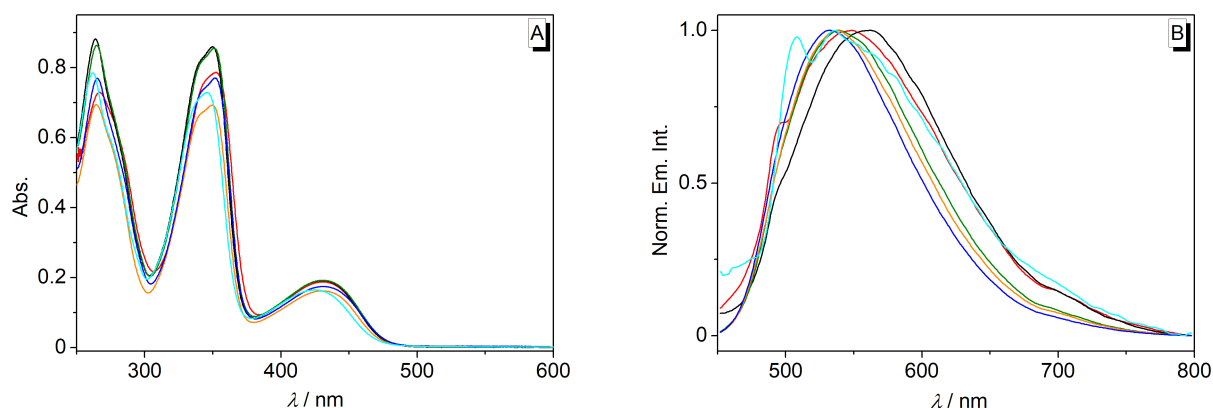

**Figure S1.** Absorption (A) and emission spectra (B) of **2** ( $c = 20$   $\mu$ M) in different solvents (red: DMSO, black: MeOH, cyan: aq. buffer, orange: MeCN, green: EtOH, blue: 1-PrOH; buffer: 16 mM BPE buffer solution at pH 7,  $\lambda_{\text{ex}} = 430$  nm).

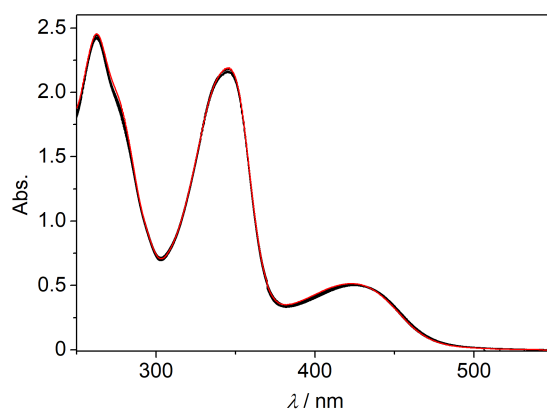

**Figure S2.** Absorption spectra of **2** ( $c = 20$   $\mu$ M) in BPE buffer at different temperature (black: 20–70 °C, red: 80 °C).

## 2. Determination of fluorescence quantum yields

Solutions were prepared for each measurement as described above from stock solutions of **2** in MeOH ( $c = 1.0$  mM). For the detection of fluorescence spectra, the excitation and emission slits were adjusted to 5 nm, and the excitation wavelengths were fixed to 340 nm. The relative fluorescence quantum yields,  $\Phi_{fl}$ , of **2** were determined under identical conditions (detection wavelength, excitation wavelength, detector voltage, slit bandwidths, collection rate). The quantum yield,  $\Phi_{fl}$ , was determined according to equation 1.

$$\Phi_{fl, X} = \frac{F_X A_S}{F_S A_X} \cdot \frac{n_X^2}{n_S^2} \cdot \Phi_{fl, S} \quad (\text{eq. 1})$$

where, the indices X and S indicate the analyte (X) and standard (S) solution.

$\Phi_{fl}$  = Fluorescence quantum yield.

$F$  = Integral of the emission band.

$A$  = Absorbance at the excitation wavelength.

$n$  = Refraction index of the solution.

Measurements were performed with coumarin 153 in ethanol as standard [ $\Phi = 0.544$ ] 1.

The estimated error is ca. 10% of the given values.

#### 4. Photometric and fluorimetric DNA titrations

Spectrophotometric and spectrofluorimetric titrations with ct DNA and quadruplex-forming oligonucleotides were performed according to published procedure [2]. All titrations were performed with 5% v/v DMSO to ensure a sufficient solubility of the ligand.

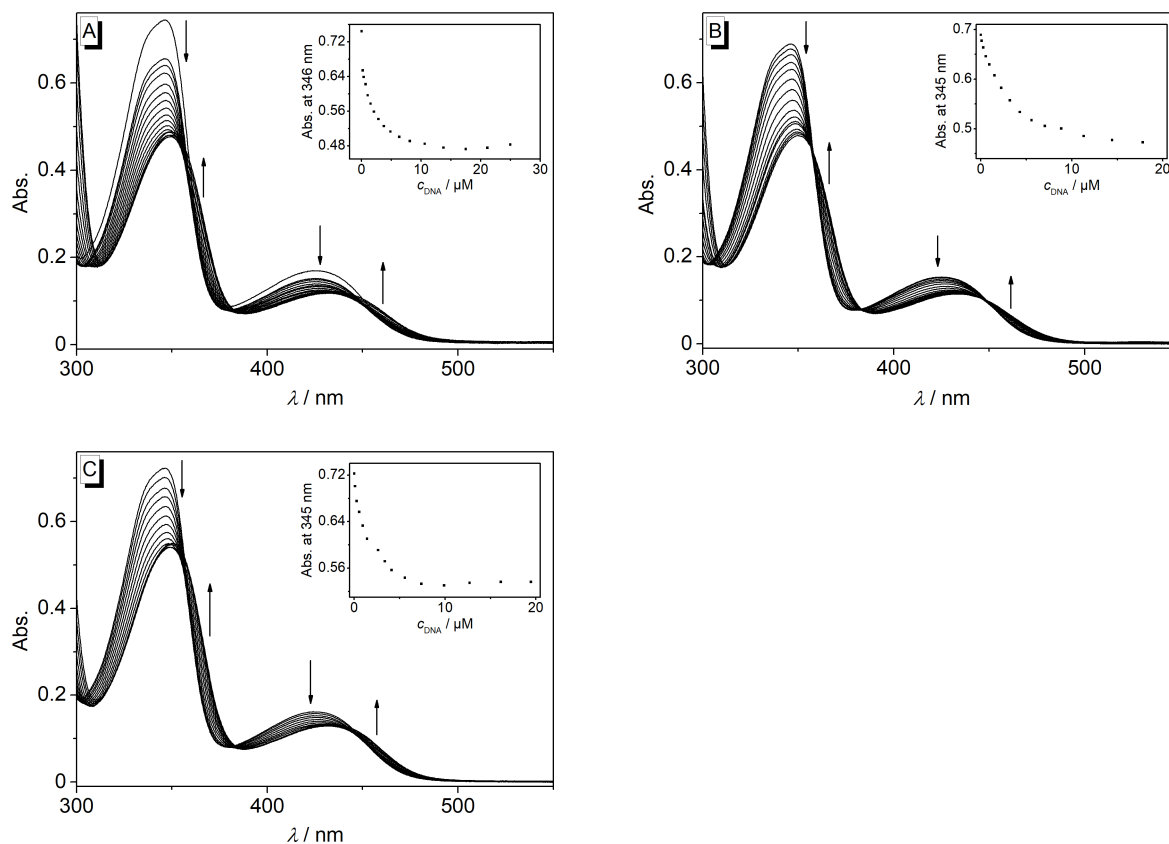

**Figure S3.** Photometric titration of **2** ( $c = 20 \mu\text{M}$ ) with **22AG** (A), **c-kit** (B) and **c-myc** (C) in K-phosphate buffer ( $c_{\text{K}^+} = 110 \text{ mM}$ , pH 7.0, with 5% v/v DMSO). The arrows indicate the changes of the absorption bands upon addition of DNA. Inset: Plot of absorption at 345 nm *versus* DNA concentration.

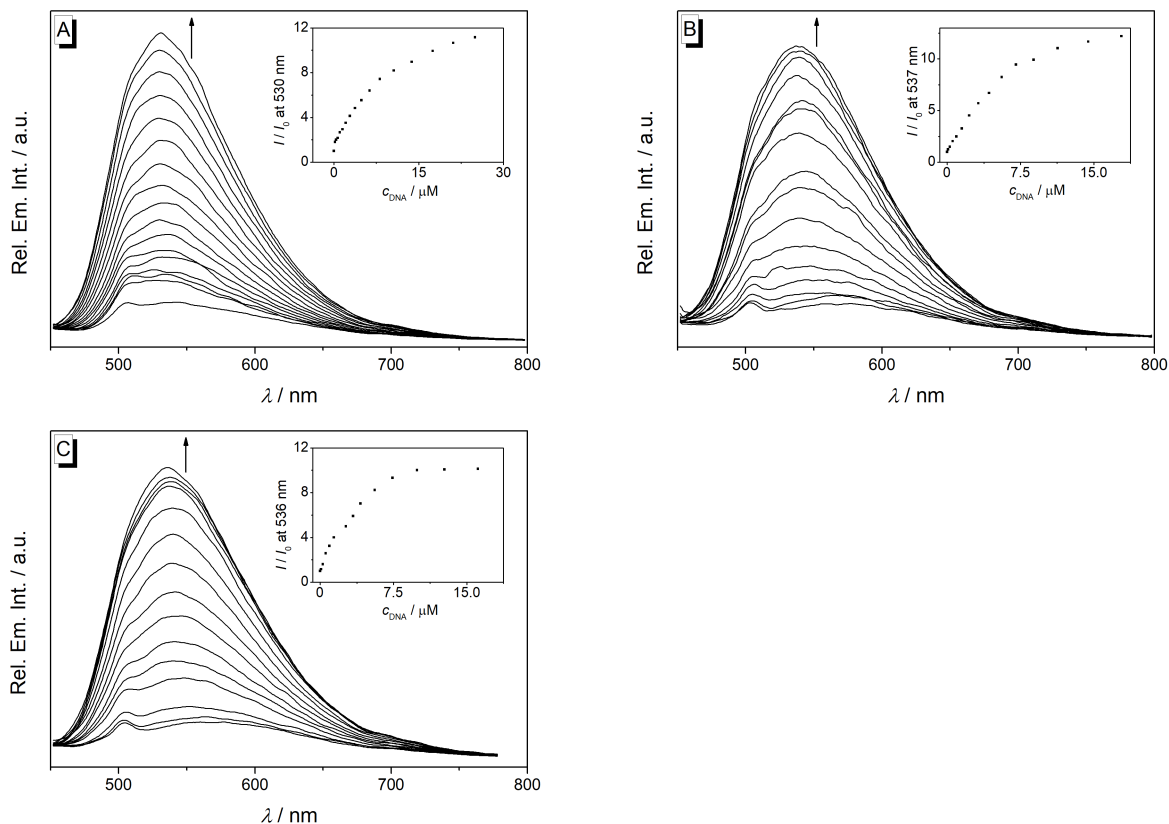

**Figure S4.** Fluorimetric titration of **2** ( $c = 20 \mu\text{M}$ ) with **22AG** (A), **c-kit** (B) and **c-myc** (C) in K-phosphate buffer ( $c_{\text{K}^+} = 110 \text{ mM}$ , pH 7.0, with 5% v/v DMSO);  $\lambda_{\text{ex}} = 430 \text{ nm}$ . The arrows indicate the changes of the emission bands upon addition of DNA. Inset: Plot of the relative fluorescence intensity *versus*  $c_{\text{DNA}}$ .

The binding constants,  $K_b$ , were determined from binding isotherms resulting from the photometric titration (Figure S6) and fitting of the experimental data to the theoretical model according to equation 2 [3].

$$\frac{I}{I_0} = 1 + \frac{Q-1}{2} \left( A + xn + 1 - \sqrt{(Q + xn + 1)^2 - 4xn} \right) \quad (\text{eq. 2})$$

$Q = I / I_0$  = Minimal absorbance in the presence of excess ligand

$n$  = Number of independent binding sites per DNA

$A = 1 / (K_b \times c_{\text{Ligand}})$

$x = c_{\text{DNA}} / c_{\text{Ligand}}$

Standard derivations (SD) of  $K_b$  values were calculated according to equation 4.

$$SD(K_b) = \{ (SD \text{ of } A / A) / A \} / c_{\text{Ligand}} \quad (\text{eq. 4})$$

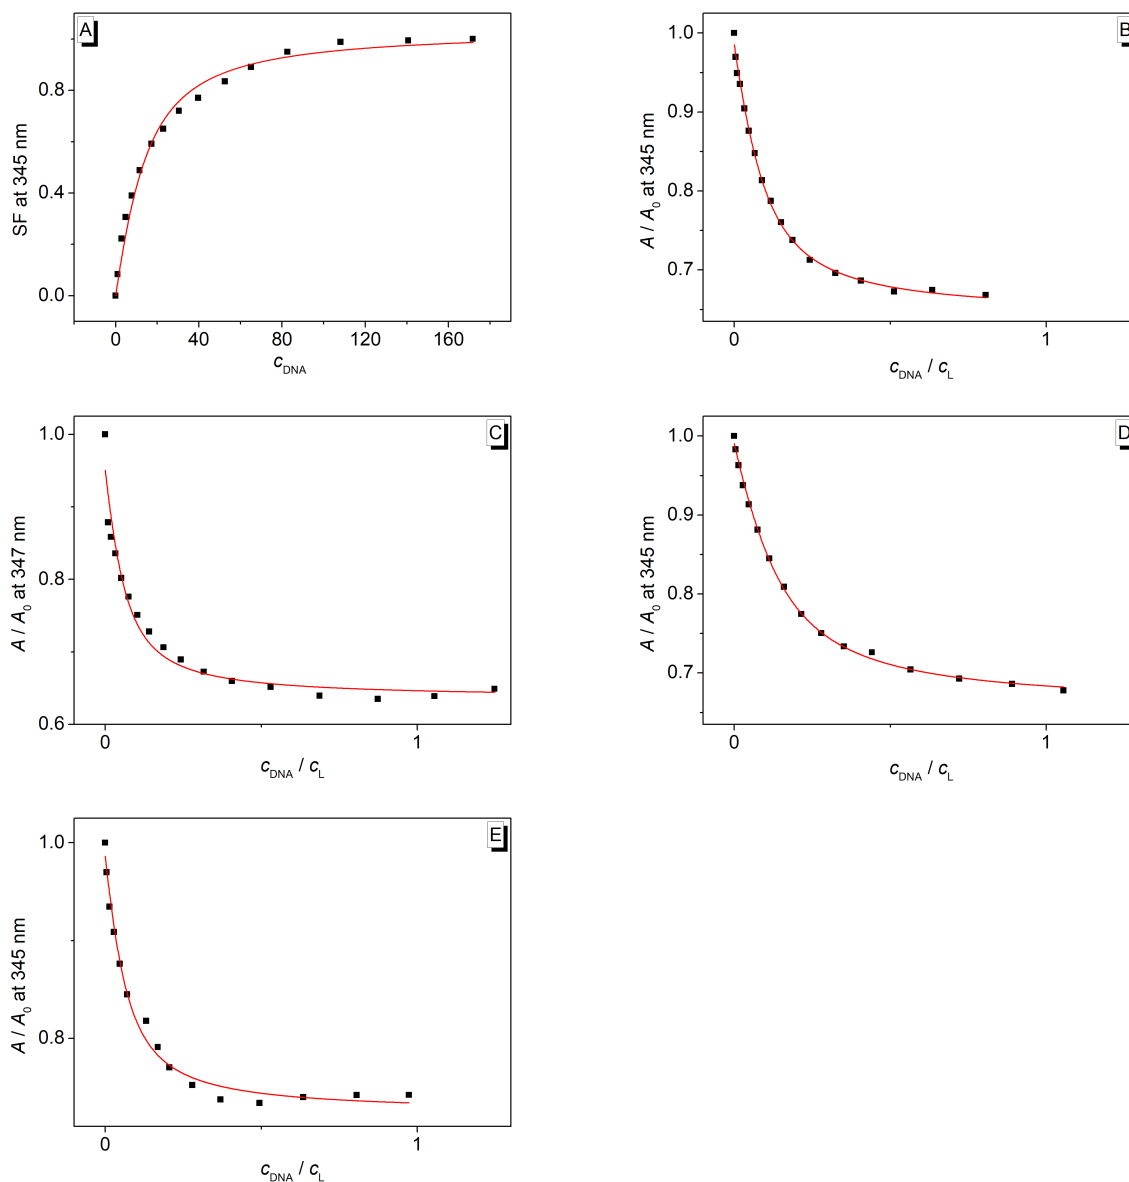

**Figure S5.** Fitting curves of binding isotherms from photometric titrations of **2** with ct DNA (A), **a2** (B), **22AG** (C), **c-kit** (D) and **c-myc** (E) for the determination of binding constants ( $K_b$ ). Red lines represent the best fits of the experimental data to the theoretical model.

## 5. Thermal DNA-denaturation experiments

Thermal DNA-denaturation experiments with the dye-labeled quadruplex-forming oligonucleotides **F21T**, **Fa2T**, **FmycT**, and **FkitT** were performed according to published procedure [4].  $^{FRET}S$  values were calculated according to equation 3 [5].

$$^{FRET}S = \Delta T_{m, G4-DNA+ds26} / \Delta T_{m, G4-DNA} \quad (\text{eq. 3})$$

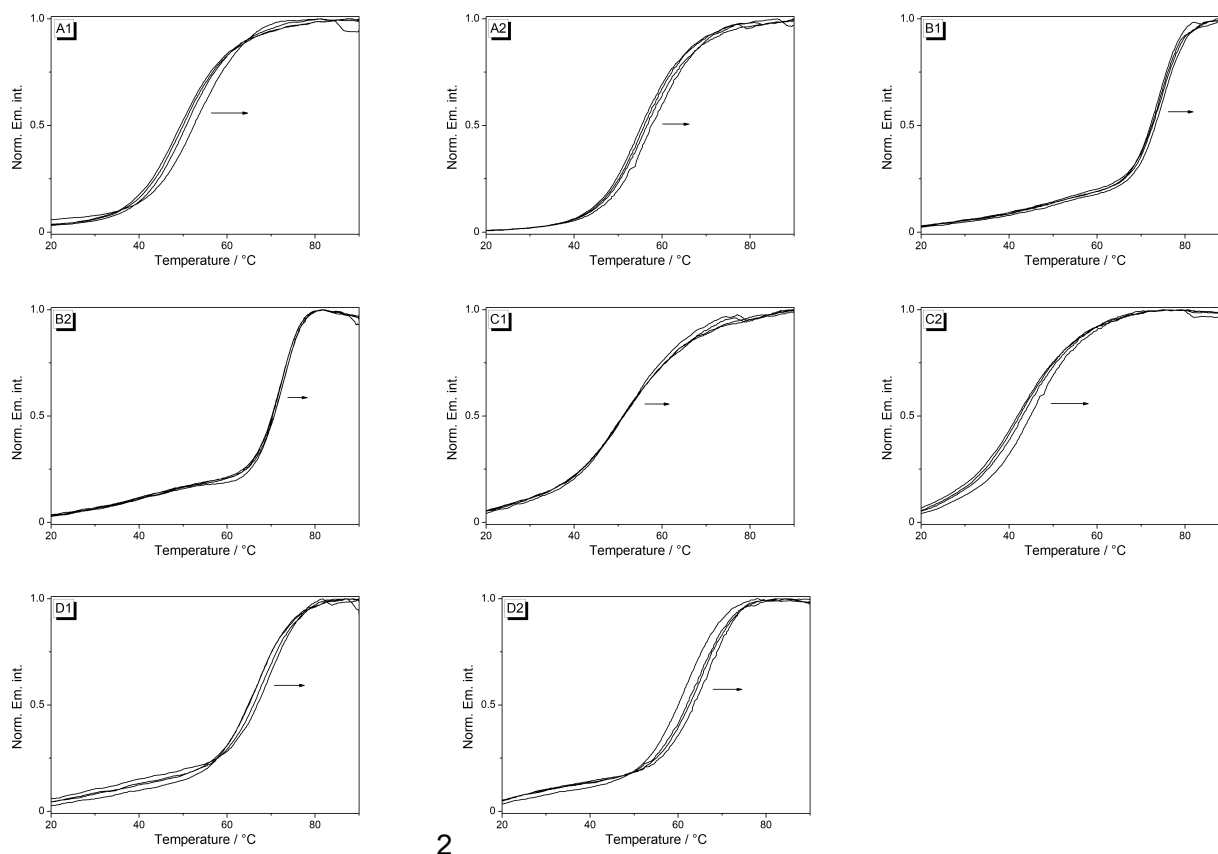

**Figure S6.** Normalized changes of emission intensity of the dye-labeled oligonucleotides **F21T** (A), **Fa2T** (B), **FkitT** (C), **FmycT** (D) (0.2  $\mu\text{M}$ ,  $\lambda_{\text{ex}} = 470 \text{ nm}$ ) at 515 nm between 20  $^{\circ}\text{C}$  and 90  $^{\circ}\text{C}$  on addition of ligand **2** in the absence (1) and presence (2) of **ds26**. Thermal denaturation experiments were performed in aqueous KCl-LiCl-Na-cacodylate buffer ( $c_{\text{K}^+} = 10 \text{ mM}$ ,  $c_{\text{Na}^+} = 10 \text{ mM}$ ,  $c_{\text{K}^+} = 90 \text{ mM}$ , pH 7.2) at different ligand-DNA ratios (0, 1.3, 2.5, 5.0).

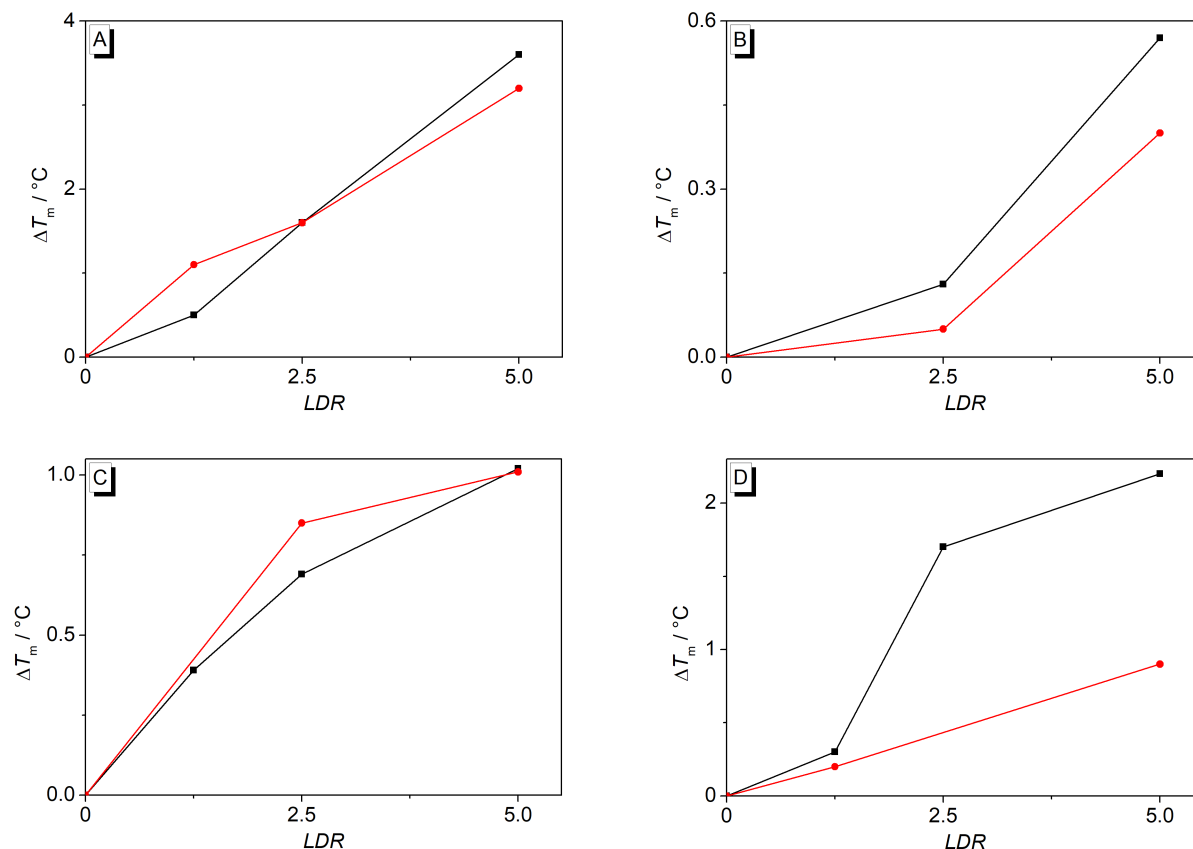

**Figure S7.** Induced shift of the melting temperature,  $\Delta T_m$ , of **F21T** (A), **Fa2T** (B), **FkitT** (C) and **FmycT** (D) ( $c = 50 \mu\text{M}$ ) upon addition of ligand **2** in the absence (black) and presence (red) of **ds26**. Thermal DNA-denaturation experiments were performed in aqueous KCl-LiCl-Na-cacodylate buffer ( $c_{\text{K}^+} = 10 \text{ mM}$ ,  $c_{\text{Na}^+} = 10 \text{ mM}$ ,  $c_{\text{K}^+} = 90 \text{ mM}$ , pH 7.2) at different ligand-DNA ratios (0, 1.3, 2.5, 5.0).

## 6. CD- and LD-spectroscopic analysis

CD and LD spectra were recorded in BPE buffer solution with ct DNA ( $c_{\text{DNA}} = 20.0 \mu\text{M}$ , with 5% v/v DMSO) and in K-phosphate buffer solution with **22AG**, **a2**, **c-kit**, **c-myc** ( $c_{\text{DNA}} = 20.0 \mu\text{M}$ , with 5% v/v DMSO) at different ligand-DNA ratios ( $LDR$ ). The CD and LD measurements with ct DNA were performed at  $LDR = 0, 0.1, 0.2, 0.5, 1.0$ . CD signals were recorded with band width of 1 nm, recording speed of 1 nm/s and time per data point of 0.5 seconds. All samples were measured after an equilibration time of 1 h.



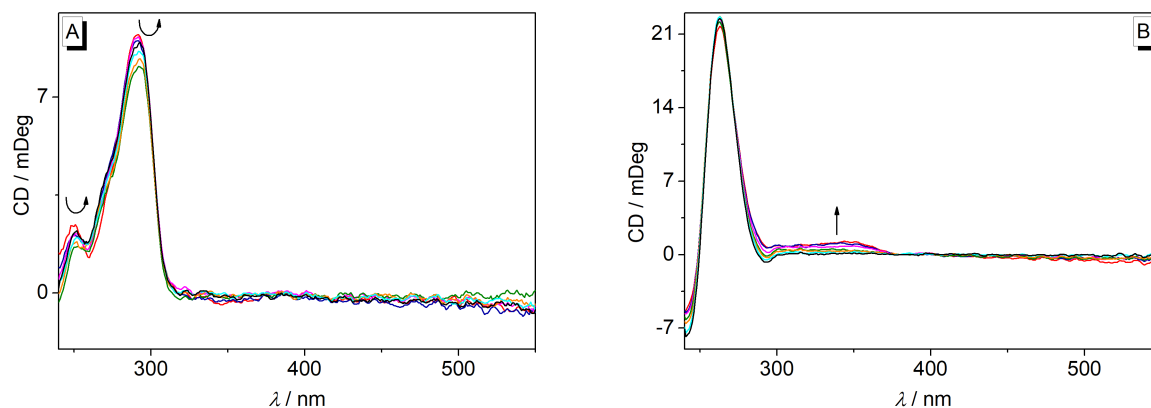

**Figure S8.** CD spectra of oligonucleotides **22AG** (A) and **c-kit** (B) ( $c_{\text{DNA}} = 20 \mu\text{M}$ ) in the absence and presence of **2** [LDR = 0 (black), 0.05 (cyan), 0.2 (orange), 0.5 (green), 1.0 (magenta), 1.5 (blue), 2.0 (red)] in K-phosphate buffer ( $c_{\text{K}^+} = 110 \text{ mM}$ , pH 7.0, with 5% v/v DMSO). The arrows indicate the changes of CD bands upon addition of DNA.

## 7. NMR spectra

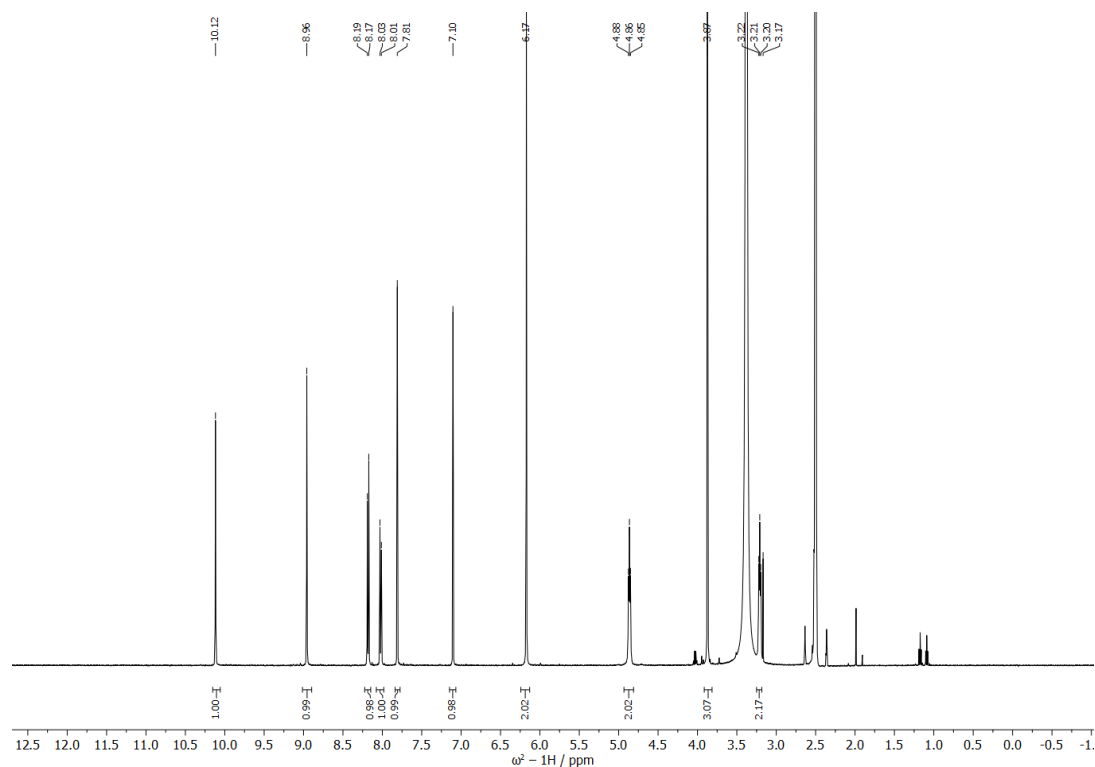

**Figure S9.**  $^1\text{H}$ -NMR spectrum (500 MHz) of **2** in  $\text{DMSO}-d_6$ .

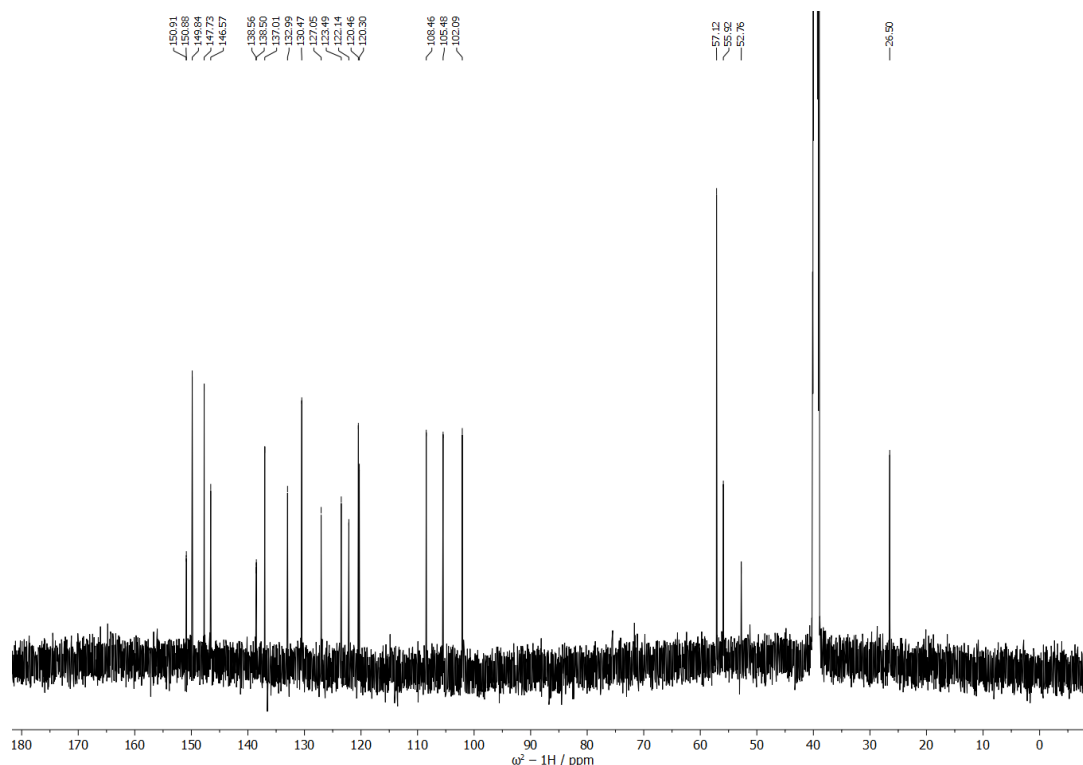

**Figure S10.**  $^{13}\text{C}$ -NMR spectrum (125 MHz) of **2** in  $\text{DMSO}-d_6$ .

## 8. References

1. Rurack, K.; Spieles, M. Fluorescence Quantum Yields of a Series of Red and Near-Infrared Dyes Emitting at 600–1000 nm. *Anal. Chem.* **2011**, *83*, pp. 1232–1242.
2. Bortolozzi, R.; Ihmels, H.; Thomas, L.; Tian, M.; Viola, G. 9-(4-Dimethylaminophenyl)-benzo[*b*]quinolizinium: A Near-Infrared Fluorophore for the Multicolor Analysis of Proteins and Nucleic Acids in Living Cells. *Chem. Eur. J.* **2013**, *19*, pp. 8736–8741.
3. Stootman, F. H.; Fisher, D. M.; Rodger, A.; Aldrich-Wright, J. R. Improved curve fitting procedures to determine equilibrium binding constants. *Analyst* **2006**, *131*, pp. 1145–1151.
4. Pithan, P. M.; Decker, D.; Druzhinin, S. I.; Ihmels, H.; Schönherr, H.; Voß, Y. 8-Styryl-substituted coralyne derivatives as DNA binding fluorescent probes. *RSC Adv.* **2017**, *7*, pp. 10660–10667.
5. Duskova, K.; Lejault, P.; Benchimol, E.; Guillot, R.; Britton, S.; Granzhan, A.; Monchaud, D. DNA Junction Ligands Trigger DNA Damage and Are Synthetic Lethal with DNA Repair Inhibitors in Cancer Cells. *J. Am. Chem. Soc.* **2020**, *142*, pp. 424–435.
